# Supplementary material for: Drug-Eluting or Bare-Metal Stents for Acute Myocardial Infarction
Source: Atypon-hosted journal article supplement (doi:10.1056/nejmoa0801485), 2008-09-24

## Supplementary Appendix

This appendix has been provided by the authors to give readers additional information about their work.

Supplement to: Mauri L, Silbaugh TS, Garg P, et al. Drug-eluting or bare-metal stents for acute myocardial infarction. *N Engl J Med* 2008;359:1330-42.

## Appendix

**Table 1. Two-year Unadjusted Clinical Outcomes**

| <b>Presentation</b> | <b>Outcome</b> | <b>DES</b>       | <b>BMS</b>       | <b>P-Value</b> |
|---------------------|----------------|------------------|------------------|----------------|
| Any MI              | Death          | 9.3% (372/4016)  | 14.3% (457/3201) | <0.001         |
|                     | MI             | 8.9% (358/4016)  | 11.2% (357/3201) | 0.002          |
|                     | TVR            | 10.4% (418/4016) | 14.8% (473/3201) | <0.001         |
| STEMI               | Death          | 7.6% (119/1558)  | 12.6% (230/1821) | <0.001         |
|                     | MI             | 7.1% (111/1558)  | 9.1% (166/1821)  | 0.04           |
|                     | TVR            | 10.2% (159/1558) | 14.3% (260/1821) | <0.001         |
| NSTEMI              | Death          | 10.3% (253/2458) | 16.5% (227/1380) | <0.001         |
|                     | MI             | 10.1% (247/2458) | 13.8% (191/1380) | <0.001         |
|                     | TVR            | 10.5% (259/2458) | 15.4% (213/1380) | <0.001         |

DES, drug-eluting stent. BMS, bare-metal stent. MI, myocardial infarction. TVR, target vessel revascularization

**Table 2. Patient Characteristics of Matched MI Cohort.**

| <b>Characteristic</b> | <b>DES<br/>(N=2570)</b> | <b>BMS<br/>(N=2570)</b> | <b>%<br/>Standardized<br/>Difference</b> |
|-----------------------|-------------------------|-------------------------|------------------------------------------|
| Age (years)           | 64.8                    | 64.0                    | 0.1                                      |
| Female                | 33.7%                   | 32.5%                   | 2.6                                      |
| Race                  |                         |                         |                                          |
| White                 | 87.5%                   | 88.4%                   | -2.9                                     |
| African-American      | 2.3%                    | 2.7%                    | -2.2                                     |
| Hispanic              | 3.9%                    | 3.6%                    | 1.6                                      |
| Other                 | 6.3%                    | 5.3%                    | 4.2                                      |
| Insurance             |                         |                         |                                          |
| Government            | 41.8%                   | 42.3%                   | -0.9                                     |
| Commercial            | 19.0%                   | 19.0%                   | 0.0                                      |
| HMO                   | 32.3%                   | 32.0%                   | 0.6                                      |
| No insurance          | 6.9%                    | 6.7%                    | 0.6                                      |
| Diabetes mellitus     | 22.0%                   | 22.8%                   | -2.0                                     |
| Insulin requiring     | 6.0%                    | 7.0%                    | -4.1                                     |
| Hyperlipidemia        | 62.7%                   | 63.4%                   | -1.5                                     |
| Hypertension          | 66.0%                   | 66.3%                   | -0.7                                     |
| Current smoker        | 31.1%                   | 30.5%                   | 1.1                                      |
| Former smoker         | 34.3%                   | 35.3%                   | -2.0                                     |
| Prior MI              | 25.3%                   | 22.6%                   | 6.5                                      |
| Prior CABG            | 9.3%                    | 8.8%                    | 1.8                                      |
| Prior PCI             | 12.5%                   | 12.7%                   | -0.5                                     |

| <b>Characteristic</b>                | <b>DES<br/>(N=2570)</b> | <b>BMS<br/>(N=2570)</b> | <b>%<br/>Standardized<br/>Difference</b> |
|--------------------------------------|-------------------------|-------------------------|------------------------------------------|
| Congestive heart failure             | 11.4%                   | 10.4%                   | 3.4                                      |
| Peripheral vascular disease          | 11.2%                   | 10.6%                   | 2.0                                      |
| Cerebrovascular disease              | 9.8%                    | 8.3%                    | 5.3                                      |
| Chronic lung disease                 | 13.0%                   | 11.4%                   | 4.8                                      |
| History of neoplasm                  | 3.0%                    | 2.7%                    | 1.6                                      |
| History of gastrointestinal bleeding | 3.3%                    | 3.3%                    | 0.0                                      |
| Chronic renal insufficiency          | 6.9%                    | 6.1%                    | 3.5                                      |
| Dialysis                             | 1.4%                    | 1.4%                    | 0.0                                      |
| Cardiogenic shock                    | 3.6%                    | 3.8%                    | -1.2                                     |
| <b>Procedure status</b>              |                         |                         |                                          |
| Urgent                               | 38.9%                   | 40.2%                   | -2.7                                     |
| Emergency/Salvage                    | 50.0%                   | 47.7%                   | 4.6                                      |
| <b>ACS duration</b>                  |                         |                         |                                          |
| 0-6 hrs                              | 43.8%                   | 43.5%                   | 0.5                                      |
| 6-24 hrs                             | 23.7%                   | 21.7%                   | 4.6                                      |
| > 24 hrs                             | 32.1%                   | 34.0%                   | -4.1                                     |
| EF < 30%                             | 8.5%                    | 6.7%                    | 6.7                                      |
| Left main disease                    | 5.8%                    | 5.3%                    | 2.6                                      |

Patients matched within propensity caliper and exactly on commercial insurance, STEMI, and number of treated lesions = 3.

**Table 3. Procedure Characteristics of Matched MI Cohort.**

| <b>Characteristic</b>                   | <b>DES<br/>(N=2570)</b> | <b>BMS<br/>(N=2570)</b> | <b>%<br/>Standardized<br/>Difference</b> |
|-----------------------------------------|-------------------------|-------------------------|------------------------------------------|
| <b>Diseased vessels</b>                 |                         |                         |                                          |
| 0-1                                     | 41.1%                   | 42.6%                   | -3.1                                     |
| 2                                       | 34.8%                   | 34.4%                   | 0.8                                      |
| <b>Lesions treated</b>                  |                         |                         |                                          |
| 2                                       | 18.9%                   | 21.1%                   | -5.5                                     |
| 3                                       | 4.3%                    | 4.3%                    | 0.0                                      |
| 4                                       | 0.6%                    | 0.8%                    | -1.9                                     |
| >4                                      | 0.1%                    | 0.2%                    | -2.8                                     |
| <b>Target vessel(s)</b>                 |                         |                         |                                          |
| Left main                               | 1.5%                    | 1.3%                    | 1.6                                      |
| Left anterior descending                | 40.3%                   | 38.0%                   | 4.6                                      |
| Circumflex                              | 25.5%                   | 28.0%                   | -5.5                                     |
| Right coronary                          | 46.0%                   | 43.9%                   | 4.2                                      |
| Saphenous vein graft                    | 5.3%                    | 4.6%                    | 3.0                                      |
| Arterial graft                          | 0.2%                    | 0.2%                    | -0.9                                     |
| High-risk lesion                        | 38.1%                   | 37.0%                   | 2.4                                      |
| Restenosis                              | 1.8%                    | 3.2%                    | -9.5                                     |
| Thrombectomy                            | 11.8%                   | 11.3%                   | 1.5                                      |
| GP IIb/IIIa inhibitor pretreatment      | 38.3%                   | 37.5%                   | 1.7                                      |
| Clopidogrel or ticlopidine pretreatment | 30.1%                   | 32.0%                   | -4.2                                     |
| Pilot program (STEMI only)              | 0.7%                    | 0.7%                    | 0.5                                      |

Patients matched within propensity caliper and exactly on commercial insurance, STEMI, and number of treated lesions = 3.

**Table 4. Patient Characteristics of Matched STEMI Cohort.**

| <b>Characteristic</b> | <b>DES<br/>(N=1298)</b> | <b>BMS<br/>(N=1298)</b> | <b>%<br/>Standardized<br/>Difference</b> |
|-----------------------|-------------------------|-------------------------|------------------------------------------|
| Age (years)           | 61.7                    | 61.8                    | 0.0                                      |
| Female                | 31.3%                   | 30.1%                   | 2.7                                      |
| Race                  |                         |                         |                                          |
| White                 | 88.4%                   | 88.9%                   | -1.5                                     |
| African-American      | 2.5%                    | 2.4%                    | 1.0                                      |
| Hispanic              | 3.6%                    | 3.6%                    | 0.0                                      |
| Other                 | 5.4%                    | 5.1%                    | 1.4                                      |
| Insurance             |                         |                         |                                          |
| Government            | 36.4%                   | 35.8%                   | 1.3                                      |
| Commercial            | 21.1%                   | 23.4%                   | -5.6                                     |
| HMO                   | 33.1%                   | 32.1%                   | 2.1                                      |
| No insurance          | 9.3%                    | 8.6%                    | 2.4                                      |
| Diabetes mellitus     | 17.6%                   | 18.3%                   | -2.0                                     |
| Insulin requiring     | 4.2%                    | 5.1%                    | -4.4                                     |
| Hyperlipidemia        | 53.7%                   | 54.4%                   | -1.4                                     |
| Hypertension          | 58.5%                   | 58.7%                   | -0.5                                     |
| Current smoker        | 37.0%                   | 35.4%                   | 3.4                                      |
| Former smoker         | 29.7%                   | 29.5%                   | 0.3                                      |
| Prior MI              | 14.6%                   | 15.0%                   | -0.9                                     |
| Prior CABG            | 3.5%                    | 3.5%                    | 0.0                                      |
| Prior PCI             | 10.9%                   | 11.1%                   | -0.7                                     |

| <b>Characteristic</b>                | <b>DES<br/>(N=1298)</b> | <b>BMS<br/>(N=1298)</b> | <b>%<br/>Standardized<br/>Difference</b> |
|--------------------------------------|-------------------------|-------------------------|------------------------------------------|
| Congestive heart failure             | 4.9%                    | 4.7%                    | 0.7                                      |
| Peripheral vascular disease          | 5.7%                    | 5.8%                    | -0.3                                     |
| Cerebrovascular disease              | 6.2%                    | 6.1%                    | 0.6                                      |
| Chronic lung disease                 | 8.9%                    | 8.4%                    | 1.6                                      |
| History of neoplasm                  | 2.2%                    | 1.9%                    | 2.2                                      |
| History of gastrointestinal bleeding | 2.9%                    | 2.8%                    | 0.9                                      |
| Chronic renal insufficiency          | 3.6%                    | 3.7%                    | -0.4                                     |
| Dialysis                             | 0.8%                    | 0.9%                    | -0.9                                     |
| Cardiogenic shock                    | 5.8%                    | 5.9%                    | -0.3                                     |
| Procedure status                     |                         |                         |                                          |
| Urgent                               | 15.6%                   | 16.6%                   | -2.9                                     |
| Emergency/Salvage                    | 80.4%                   | 79.7%                   | 1.7                                      |
| EF <30%                              | 6.5%                    | 7.3%                    | -3.0                                     |
| Left main disease                    | 3.2%                    | 3.1%                    | 0.4                                      |

Patients matched within propensity caliper.

**Table 5. Procedure Characteristics of Matched STEMI Cohort.**

| <b>Characteristic</b>                   | <b>DES<br/>(N=1298)</b> | <b>BMS<br/>(N=1298)</b> | <b>%<br/>Standardized<br/>Difference</b> |
|-----------------------------------------|-------------------------|-------------------------|------------------------------------------|
| <b>Diseased vessels</b>                 |                         |                         |                                          |
| 0-1                                     | 45.9%                   | 45.4%                   | 1.1                                      |
| 2                                       | 33.7%                   | 34.4%                   | -1.3                                     |
| <b>Lesions treated</b>                  |                         |                         |                                          |
| 2                                       | 18.2%                   | 19.1%                   | -2.4                                     |
| 3                                       | 3.9%                    | 4.2%                    | -2.0                                     |
| 4                                       | 0.3%                    | 0.5%                    | -3.6                                     |
| >4                                      | 0.2%                    | 0.2%                    | -1.8                                     |
| <b>Target vessel(s)</b>                 |                         |                         |                                          |
| Left main                               | 0.5%                    | 0.6%                    | -1.0                                     |
| Left anterior descending                | 42.6%                   | 39.5%                   | 6.3                                      |
| Circumflex                              | 16.3%                   | 18.8%                   | -6.5                                     |
| Right coronary                          | 51.2%                   | 49.8%                   | 2.8                                      |
| Saphenous vein graft                    | 1.9%                    | 1.9%                    | 0.0                                      |
| Arterial graft                          | 0.1%                    | 0.2%                    | -2.3                                     |
| High-risk lesion                        | 43.7%                   | 44.7%                   | -2.0                                     |
| Restenosis                              | 2.0%                    | 3.3%                    | -8.1                                     |
| Thrombectomy                            | 16.9%                   | 17.0%                   | -0.4                                     |
| GP IIb/IIIa inhibitor pretreatment      | 41.5%                   | 41.8%                   | -0.8                                     |
| Clopidogrel or ticlopidine pretreatment | 26.0%                   | 25.4%                   | 1.4                                      |
| Pilot program (STEMI only)              | 1.5%                    | 1.3%                    | 1.3                                      |

Patients matched within propensity caliper.

**Table 6. Patient Characteristics of Matched NSTEMI Cohort.**

| <b>Characteristic</b> | <b>DES<br/>(N=1228)</b> | <b>BMS<br/>(N=1228)</b> | <b>%<br/>Standardized<br/>Difference</b> |
|-----------------------|-------------------------|-------------------------|------------------------------------------|
| Age (years)           | 68.1                    | 66.8                    | 0.1                                      |
| Female                | 36.9%                   | 35.2%                   | 3.6                                      |
| Race                  |                         |                         |                                          |
| White                 | 87.3%                   | 88.3%                   | -3.0                                     |
| African-American      | 1.9%                    | 2.4%                    | -3.9                                     |
| Hispanic              | 3.9%                    | 3.9%                    | 0.0                                      |
| Other                 | 6.9%                    | 5.4%                    | 6.4                                      |
| Insurance             |                         |                         |                                          |
| Government            | 46.7%                   | 49.0%                   | -4.7                                     |
| Commercial            | 15.7%                   | 15.7%                   | 0.0                                      |
| HMO                   | 32.3%                   | 30.5%                   | 3.9                                      |
| No insurance          | 5.3%                    | 4.7%                    | 2.6                                      |
| Diabetes mellitus     | 26.4%                   | 28.8%                   | -5.3                                     |
| Insulin requiring     | 8.1%                    | 9.4%                    | -4.6                                     |
| Hyperlipidemia        | 68.9%                   | 72.3%                   | -7.5                                     |
| Hypertension          | 72.6%                   | 74.5%                   | -4.4                                     |
| Current smoker        | 24.8%                   | 24.5%                   | 0.6                                      |
| Former smoker         | 39.3%                   | 40.6%                   | -2.7                                     |
| Prior MI              | 34.0%                   | 32.1%                   | 4.0                                      |
| Prior CABG            | 15.1%                   | 14.7%                   | 0.9                                      |
| Prior PCI             | 13.8%                   | 15.2%                   | -4.2                                     |

| <b>Characteristic</b>                | <b>DES<br/>(N=1228)</b> | <b>BMS<br/>(N=1228)</b> | <b>%<br/>Standardized<br/>Difference</b> |
|--------------------------------------|-------------------------|-------------------------|------------------------------------------|
| Congestive heart failure             | 16.5%                   | 15.2%                   | 3.3                                      |
| Peripheral vascular disease          | 14.8%                   | 15.3%                   | -1.4                                     |
| Cerebrovascular disease              | 13.6%                   | 11.5%                   | 6.4                                      |
| Chronic lung disease                 | 15.2%                   | 14.3%                   | 2.5                                      |
| History of neoplasm                  | 4.0%                    | 3.3%                    | 3.5                                      |
| History of gastrointestinal bleeding | 3.8%                    | 3.3%                    | 2.6                                      |
| Chronic renal insufficiency          | 10.0%                   | 9.5%                    | 1.9                                      |
| Dialysis                             | 1.6%                    | 2.1%                    | -4.2                                     |
| Cardiogenic shock                    | 1.3%                    | 1.4%                    | -0.7                                     |
| Procedure status                     |                         |                         |                                          |
| Urgent                               | 65.8%                   | 66.0%                   | -0.51                                    |
| Emergency/Salvage                    | 16.1%                   | 13.6%                   | 7.1                                      |
| ACS duration                         |                         |                         |                                          |
| 0-6 hrs                              | 16.2%                   | 15.6%                   | 1.6                                      |
| 6-24 hrs                             | 30.0%                   | 27.4%                   | 5.8                                      |
| > 24 hrs                             | 52.4%                   | 55.7%                   | -6.5                                     |
| EF < 30%                             | 8.2%                    | 6.9%                    | 4.9                                      |
| Left main disease                    | 9.0%                    | 7.6%                    | 5.0                                      |

Patients matched within propensity caliper and exactly on commercial insurance, number of treated lesions = 3, and treatment of right coronary artery.

**Table 7. Procedure Characteristics of Matched NSTEMI Cohort.**

| <b>Characteristic</b>                   | <b>DES<br/>(N=1228)</b> | <b>BMS<br/>(N=1228)</b> | <b>%<br/>Standardized<br/>Difference</b> |
|-----------------------------------------|-------------------------|-------------------------|------------------------------------------|
| <hr/>                                   |                         |                         |                                          |
| Diseased vessels                        |                         |                         |                                          |
| 0-1                                     | 38.1%                   | 38.5%                   | -0.8                                     |
| 2                                       | 33.7%                   | 33.9%                   | -0.3                                     |
| >1 lesion treated                       | 21.5%                   | 22.6%                   | -2.7                                     |
| Target vessel(s)                        |                         |                         |                                          |
| Left main                               | 2.2%                    | 2.0%                    | 1.7                                      |
| Left anterior descending                | 37.3%                   | 36.2%                   | 2.2                                      |
| Circumflex                              | 39.7%                   | 37.8%                   | 3.8                                      |
| Right coronary                          | 37.4%                   | 37.4%                   | 0.0                                      |
| Saphenous vein graft                    | 9.1%                    | 8.4%                    | 2.6                                      |
| Arterial graft                          | 0.3%                    | 0.2%                    | 3.3                                      |
| High-risk lesion                        | 30.1%                   | 29.6%                   | 1.1                                      |
| Restenosis                              | 2.3%                    | 3.3%                    | -6.4                                     |
| Thrombectomy                            | 16.8%                   | 17.0%                   | -0.4                                     |
| GP IIb/IIIa inhibitor pretreatment      | 38.0%                   | 33.8%                   | 8.7                                      |
| Clopidogrel or ticlopidine pretreatment | 35.5%                   | 37.5%                   | -4.2                                     |

Patients matched within propensity caliper and exactly on commercial insurance, number of treated lesions = 3, and treatment of right coronary artery.

**Table 8. Two-day Adjusted Mortality**

| Presentation | DES            | BMS            | Paired Rate Difference |         |
|--------------|----------------|----------------|------------------------|---------|
|              |                |                | (DES-BMS)<br>[95% CI]  | P-Value |
| Any MI       | 0.7% (18/2571) | 1.2% (31/2571) | -0.5% [-1.0%, 0.0%]    | 0.06    |
| STEMI        | 0.9% (12/1298) | 1.9% (24/1298) | -0.9% [-1.8%, 0.0%]    | 0.04    |
| NSTEMI       | 0.5% (6/1228)  | 0.8% (10/1228) | -0.3% [-1.0%, 0.3%]    | 0.32    |

**Table 9. Two-year Clinical Outcomes Adjusted for Time**

| Presentation         | Outcome | DES Only            | BMS Only            | Rate Difference       | P-Value |
|----------------------|---------|---------------------|---------------------|-----------------------|---------|
|                      |         |                     |                     | (DES-BMS)<br>[95% CI] |         |
| Any MI<br>1679 Pairs | Death   | 10.3%<br>(173/1679) | 13.6%<br>(228/1679) | -3.3% [-5.5%, -1.1%]  | 0.003   |
|                      | MI      | 8.8%<br>(147/1679)  | 11.1%<br>(186/1679) | -2.3% [-4.4%, -0.3%]  | 0.03    |
|                      | TVR     | 10.1%<br>(171/1679) | 15.4%<br>(258/1679) | -5.2% [-7.4%, -3.0%]  | <0.001  |
| STEMI<br>784 Pairs   | Death   | 8.4%<br>(66/784)    | 12.1%<br>(95/784)   | -3.7% [-6.7%, -0.7%]  | 0.02    |
|                      | MI      | 7.5%<br>(59/784)    | 8.0%<br>(63/784)    | -0.5% [-3.2%, 2.1%]   | 0.71    |
|                      | TVR     | 11.1%<br>(87/784)   | 14.4%<br>(113/784)  | -3.3% [-6.6%, 0.0%]   | 0.04    |
| NSTEMI<br>851 Pairs  | Death   | 11.9%<br>(101/851)  | 14.7%<br>(125/851)  | -2.8% [-6.0%, 0.4%]   | 0.08    |
|                      | MI      | 10.0%<br>(85/851)   | 14.5%<br>(123/851)  | -4.5% [-7.6%, -1.3%]  | 0.005   |
|                      | TVR     | 8.9%<br>(76/851)    | 15.8%<br>(134/851)  | -6.8% [-10.0%, -3.6%] | <0.001  |

DES, drug-eluting stent. BMS, bare-metal stent. MI, myocardial infarction. TVR, target vessel revascularization

**Table 10. Two-Year Adjusted Mortality in STEMI After Exclusions from Initial Sample of 3379 Patients.**

| Exclusion                 | DES             | BMS              | Paired Rate Difference | P-Value |
|---------------------------|-----------------|------------------|------------------------|---------|
|                           |                 |                  | (DES-BMS)<br>[95% CI]  |         |
| Pilot program             | 8.7% (110/1272) | 11.2% (142/1272) | -2.5% [-4.8%, -0.2%]   | 0.03    |
| ACS duration<br>>24 hours | 8.5% (95/1121)  | 11.3% (127/1121) | -2.9% [-5.3%, -0.4%]   | 0.02    |

### Figure 1. Drug-Eluting and Bare Metal Stent Procedure Numbers According to Time.

The number of procedures performed with drug-eluting stents vs bare metal stents are shown according to time before propensity score matching (A and B) and after propensity score matching including adjustment for time (C and D)

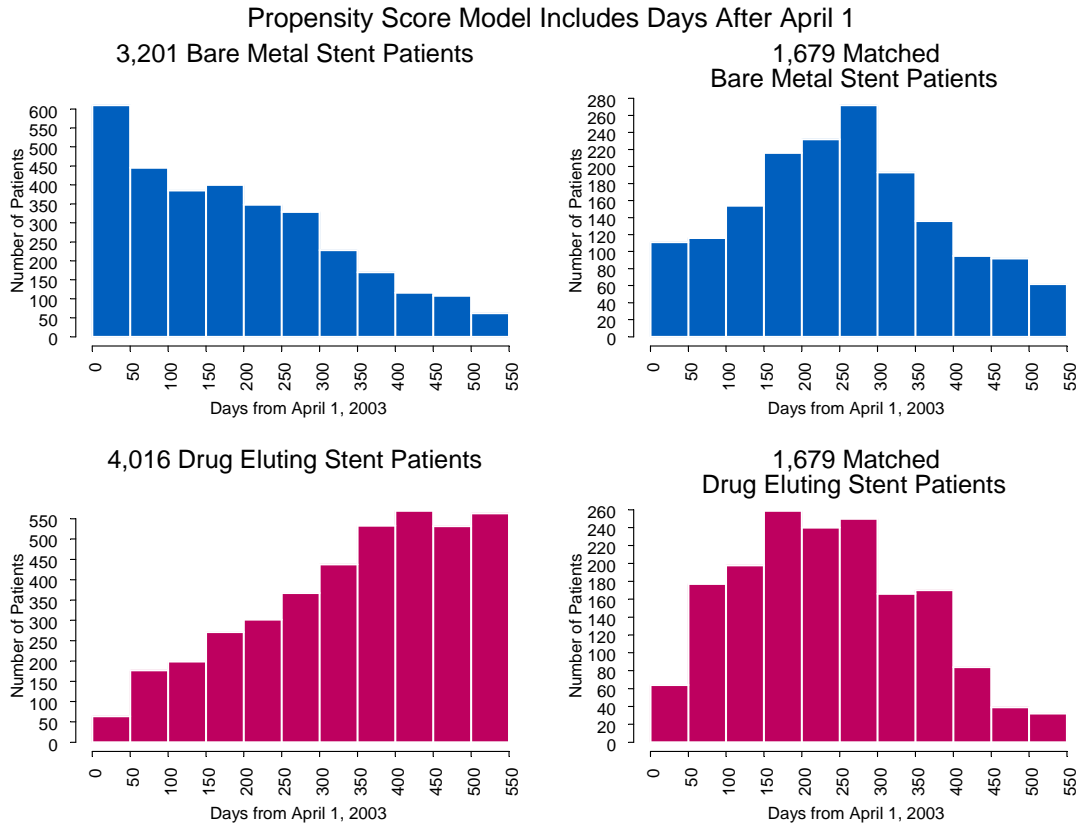

**Figure 2. Study Flow Diagram**

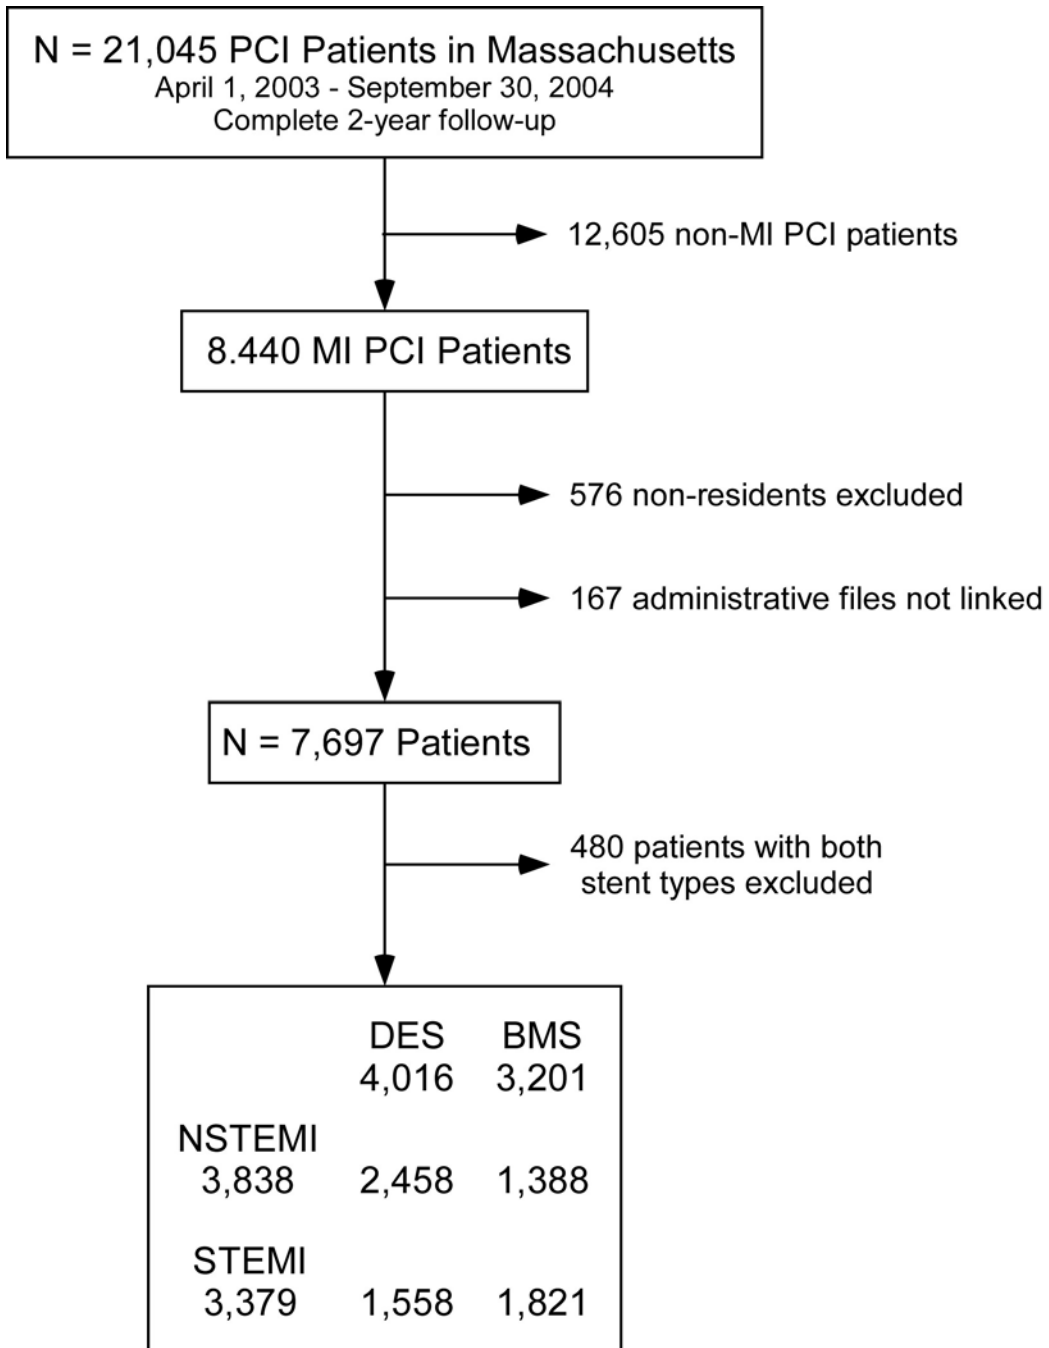

Supplement: nejm_mauri_1330sa1.pdf [file nejm_mauri_1330sa1.pdf]
